# Supplementary material for: Mental Health Outcomes and Academic Learning Performance of College Students during COVID-19
Source: Research Square preprint supplement (doi:10.21203/rs.3.rs-6622963/v1), 2025-06-09
Supplement: Supplementary file 1 [file cf3426c09738e622ae54fc3f.docx]

Table A1. Survey information and taking frequency.

| **Survey type** | **Questions** | **Question number** | **Survey-taking frequency** |
| --- | --- | --- | --- |
| Demographics | Sex | 1 | Only once (at the beginning of the study) |
| Age | 1 |
| College class year | 1 |
| Socioeconomic status | Family annual income  Parents/ Guardians employer  Number of owned cars  Number of people in home  Number of bedrooms in home | 1  1  1  1  1 | Only once (at the beginning of the study) |
| Daily activity | Time-diaries on different activities | 9 | Daily |
| Mental health | Perceived stress scale (PSS) | 4 | Weekly |
| Positive and negative affect schedule (PANAS) | 1 | Weekly |
| Center for Epidemiological Studies-Depression (CES-D) | 10 | Monthly |
| State-Trait Anxiety | 40 | Monthly |
| GPA and online learning performance | Transcripts | 1 | Only once (at the end of the participation) |
| Online student engagement | 19 | Weekly |

Table A2. Subjects’ Demographic and family socio-economic status distribution

| **Ethnicity** | **%** |
| --- | --- |
| White | 56.4 |
| Asian | 26.4 |
| Hispanic/Latino | 10.7 |
| Black or Africa American | 2.9 |
| Others | 3.6 |
| **Annual income ($)** | **%** |
| <10k | 1.4 |
| 10-49k | 27.9 |
| 50-99k | 10.7 |
| 100-149k | 32.1 |
| >149k | 26.4 |
| **No. of possessed car** | **%** |
| 0-2 | 36.4 |
| 3-4 | 51.4 |
| ≥5 | 11.4 |
| **Home ownership** | **%** |
| Own without mortgage | 32.1 |
| Own with mortgage | 52.9 |
| Rent | 7.9 |
| Not sure | 7.1 |
| **Sex** |  |
| Male | 30.5 |
| Female | 68.8 |
| **School year** |  |
| 1st | 25 |
| 2nd | 25.7 |
| 3rd | 27.9 |
| 4th | 21.4 |
| **No. of people living in the house/apartment** |  |
| 1-3 | 34.3 |
| 4-6 | 63.6 |
| 6+ | 0.01 |
| **No. of the bedroom** |  |
| 1-2 | 11.4 |
| 3-4 | 82.1 |
| ≥5 | 5.7 |
| **Parents’ employment** |  |
| Private company &Business | 74.1 |
| Individual & Self-employment | 15.1 |
| Government | 10.1 |

Table A3. Regression results of mental health on GPA and OSE

| **Learning** | **Mental health outcomes** | **B** | **SE** | **95% CI** | **P-value** |
| --- | --- | --- | --- | --- | --- |
| GPA | Stress | -0.02 | 0.06 | -0.14 to 0.10 | .755 |
| Depression | -0.01 | 0.05 | -0.10 to 0.08 | .839 |
| Anxiety | -0.07 | 0.08 | -0.26 to 0.11 | .438 |
| Online student engagement (OSE) | Stress | -0.92 | 0.25 | -1.40 to -0.17 | <.001*** |
| Depression | -0.34 | 0.12 | -0.51 to 0.04 | .005** |
| Anxiety | -0.02 | 0.05 | -0.15 to 0.11 | .772 |


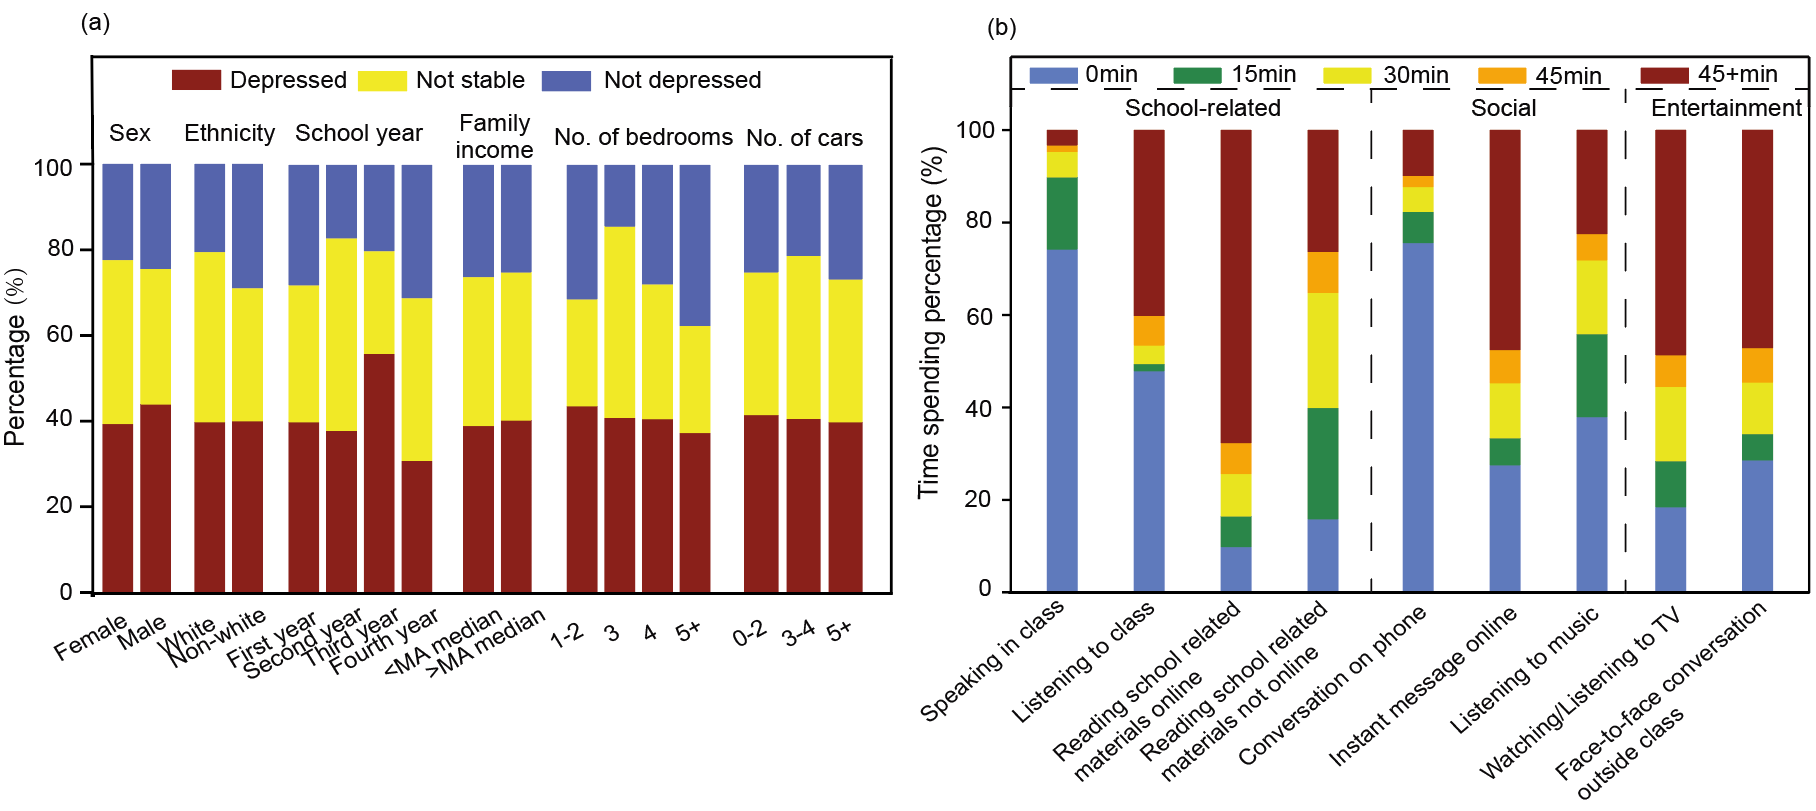


Figure A1. Participants' depression status and daily activity time use (a) Distribution of depression status among different demographic and SES groups1 (% of total participants); (b) Distribution of time spent on daily activities (% of total weekly responses per activity, participants could contribute multiple responses)

**Reference**

1. U.S. Census Bureau QuickFacts: Massachusetts. https://www.census.gov/quickfacts/fact/table/MA/INC110221. Accessed April 18, 2025.
